# Supplementary material for: Role of tumor necrosis factor-α in the mortality of hospitalized patients with severe and critical COVID-19 pneumonia
Source: publisher site journal article supplement (doi:10.18632/aging.203663), 2021-11-01
Supplement: Supplementary file [file aging-v13i21-203663-supplementary-material-SD1.pdf]

## SUPPLEMENTARY TABLES

**Supplementary Table 1. Cox regression analysis of death among patients with severe and critical COVID-19.**

| Variable                         | Hazard ratio | 95%CI       | P value |
|----------------------------------|--------------|-------------|---------|
| Model1                           |              |             |         |
| Sex(M/F)                         | 1.104        | 0.572-2.130 | 0.768   |
| Age(years)                       | 1.046        | 1.020-1.072 | <0.001  |
| IL-1 $\beta$ (pg/ml)             | 0.527        | 0.214-1.295 | 0.163   |
| Model2                           |              |             |         |
| Sex(M/F)                         | 1.115        | 0.513-2.427 | 0.783   |
| Age(years)                       | 1.014        | 0.979-1.051 | 0.426   |
| Breathe(times/min)               | 1.006        | 0.952-1.063 | 0.821   |
| Heart rate(times/min)            | 1.002        | 0.983-1.021 | 0.850   |
| SaO <sub>2</sub> (%)             | 0.960        | 0.931-0.990 | 0.008   |
| Systolic blood pressure (mmHg)   | 1.007        | 0.989-1.026 | 0.463   |
| Alanine aminotransferase(U/L)    | 0.999        | 0.996-1.002 | 0.554   |
| eGFR(ml/min/1.73m <sup>2</sup> ) | 0.981        | 0.967-0.994 | 0.005   |
| COPD                             | 2.169        | 0.583-8.076 | 0.248   |
| CAD                              | 1.112        | 0.474-2.610 | 0.807   |
| DM                               | 2.070        | 0.905-4.735 | 0.085   |
| IL-1 $\beta$ (pg/ml)             | 0.487        | 0.183-1.297 | 0.150   |

Model 1: different cytokine adjusted for age and sex.

Model 2: different cytokine adjusted for age, sex, breathe, heart rate, SaO<sub>2</sub>, systolic blood pressure, alanine aminotransferase, eGFR, COPD, CAD, and DM.

Abbreviations: SaO<sub>2</sub>, oxygen saturation; eGFR, estimated glomerular filtration rate; COPD, chronic obstructive pulmonary disease; CAD, coronary artery disease; DM, diabetes mellitus; CI, confidence interval, IL interleukin.

**Supplementary Table 2. Cox regression analysis of death among patients with severe and critical COVID-19.**

| <b>Variable</b>                  | <b>Hazard ratio</b> | <b>95%CI</b> | <b>P value</b> |
|----------------------------------|---------------------|--------------|----------------|
| <b>Model1</b>                    |                     |              |                |
| Sex(M/F)                         | 0.986               | 0.518-1.879  | 0.967          |
| Age(years)                       | 1.047               | 1.020-1.075  | 0.001          |
| IL-6 (pg/ml)                     | 1.000               | 1.000-1.000  | 0.793          |
| <b>Model2</b>                    |                     |              |                |
| Sex(M/F)                         | 1.041               | 0.496-2.187  | 0.915          |
| Age(years)                       | 1.013               | 0.977-1.051  | 0.477          |
| Breathe(times/min)               | 0.986               | 0.941-1.033  | 0.558          |
| Heart rate(times/min)            | 0.999               | 0.980-1.018  | 0.884          |
| SaO <sub>2</sub> (%)             | 0.952               | 0.922-0.982  | 0.002          |
| Systolic blood pressure (mmHg)   | 1.004               | 0.987-1.021  | 0.644          |
| Alanine aminotransferase(U/L)    | 1.000               | 0.996-1.003  | 0.835          |
| eGFR(ml/min/1.73m <sup>2</sup> ) | 0.979               | 0.966-0.992  | 0.002          |
| COPD                             | 2.547               | 0.685-9.471  | 0.163          |
| CAD                              | 1.059               | 0.432-2.596  | 0.900          |
| DM                               | 2.458               | 1.089-5.548  | 0.030          |
| IL-6 (pg/ml)                     | 1.000               | 1.000-1.000  | 0.325          |

Model 1: different cytokine adjusted for age and sex.

Model 2: different cytokine adjusted for age, sex, breathe, heart rate, SaO<sub>2</sub>, systolic blood pressure, alanine aminotransferase, eGFR, COPD, CAD, and DM.

Abbreviations: SaO<sub>2</sub>, oxygen saturation; eGFR, estimated glomerular filtration rate; COPD, chronic obstructive pulmonary disease; CAD, coronary artery disease; DM, diabetes mellitus; CI, confidence interval, IL interleukin.

**Supplementary Table 3. Cox regression analysis of death among patients with severe and critical COVID-19.**

| <b>Variable</b>                  | <b>Hazard ratio</b> | <b>95%CI</b> | <b>P value</b> |
|----------------------------------|---------------------|--------------|----------------|
| <b>Model1</b>                    |                     |              |                |
| Sex(M/F)                         | 0.972               | 0.497-1.899  | 0.933          |
| Age(years)                       | 1.046               | 1.020-1.073  | <0.001         |
| IL-8 (pg/ml)                     | 1.001               | 0.999-1.002  | 0.258          |
| <b>Model2</b>                    |                     |              |                |
| Sex(M/F)                         | 0.922               | 0.418-2.033  | 0.840          |
| Age(years)                       | 1.017               | 0.981-1.055  | 0.354          |
| Breathe(times/min)               | 0.989               | 0.943-1.036  | 0.632          |
| Heart rate(times/min)            | 1.000               | 0.981-1.019  | 0.981          |
| SaO <sub>2</sub> (%)             | 0.954               | 0.926-0.982  | 0.002          |
| Systolic blood pressure (mmHg)   | 1.003               | 0.985-1.020  | 0.778          |
| Alanine aminotransferase(U/L)    | 0.999               | 0.996-1.003  | 0.719          |
| eGFR(ml/min/1.73m <sup>2</sup> ) | 0.979               | 0.966-0.993  | 0.003          |
| COPD                             | 2.473               | 0.677-9.029  | 0.171          |
| CAD                              | 1.101               | 0.462-2.622  | 0.828          |
| DM                               | 2.486               | 1.091-5.669  | 0.030          |
| IL-8(pg/ml)                      | 1.001               | 0.999-1.003  | 0.211          |

Model 1: different cytokine adjusted for age and sex.

Model 2: different cytokine adjusted for age, sex, breathe, heart rate, SaO<sub>2</sub>, systolic blood pressure, alanine aminotransferase, eGFR, COPD, CAD, and DM.

Abbreviations: SaO<sub>2</sub>, oxygen saturation; eGFR, estimated glomerular filtration rate; COPD, chronic obstructive pulmonary disease; CAD, coronary artery disease; DM, diabetes mellitus; CI, confidence interval, IL interleukin.

**Supplementary Table 4. Cox regression analysis of death among patients with severe and critical COVID-19.**

| <b>Variable</b>                  | <b>Hazard ratio</b> | <b>95%CI</b> | <b>P value</b> |
|----------------------------------|---------------------|--------------|----------------|
| <b>Model1</b>                    |                     |              |                |
| Sex(M/F)                         | 1.017               | 0.526-1.968  | 0.960          |
| Age(years)                       | 1.042               | 1.015-1.070  | 0.002          |
| IL-10 (pg/ml)                    | 1.013               | 0.995-1.032  | 0.161          |
| <b>Model2</b>                    |                     |              |                |
| Sex(M/F)                         | 0.946               | 0.438-2.041  | 0.887          |
| Age(years)                       | 1.010               | 0.974-1.049  | 0.584          |
| Breathe(times/min)               | 0.985               | 0.940-1.032  | 0.529          |
| Heart rate(times/min)            | 0.998               | 0.980-1.018  | 0.875          |
| SaO <sub>2</sub> (%)             | 0.951               | 0.923-0.980  | 0.001          |
| Systolic blood pressure (mmHg)   | 1.004               | 0.986-1.022  | 0.681          |
| Alanine aminotransferase(U/L)    | 0.999               | 0.996-1.002  | 0.475          |
| eGFR(ml/min/1.73m <sup>2</sup> ) | 0.980               | 0.966-0.994  | 0.004          |
| COPD                             | 2.988               | 0.785-11.369 | 0.108          |
| CAD                              | 1.060               | 0.444-2.529  | 0.896          |
| DM                               | 2.548               | 1.118-5.807  | 0.026          |
| IL-10(pg/ml)                     | 1.022               | 0.999-1.044  | 0.059          |

Model 1: different cytokine adjusted for age and sex.

Model 2: different cytokine adjusted for age, sex, breathe, heart rate, SaO<sub>2</sub>, systolic blood pressure, alanine aminotransferase, eGFR, COPD, CAD, and DM.

Abbreviations: SaO<sub>2</sub>, oxygen saturation; eGFR, estimated glomerular filtration rate; COPD, chronic obstructive pulmonary disease; CAD, coronary artery disease; DM, diabetes mellitus; CI, confidence interval, IL interleukin.
